# Supplementary material for: ProphNet: A generic prioritization method through propagation of information
Source: PubMed Central journal article supplement (PMC4015146; doi:10.1186/1471-2105-15-s1-s5), 2014-01-10
Supplement: 1471-2105-15-S1-S5-S1.pdf [file 1471-2105-15-S1-S5-S1.pdf]

# **PROPAGATION AND CORRELATION ANALYSIS RESULTS** **(GENE-DISEASE LEAVE-ONE-OUT VALIDATION)**

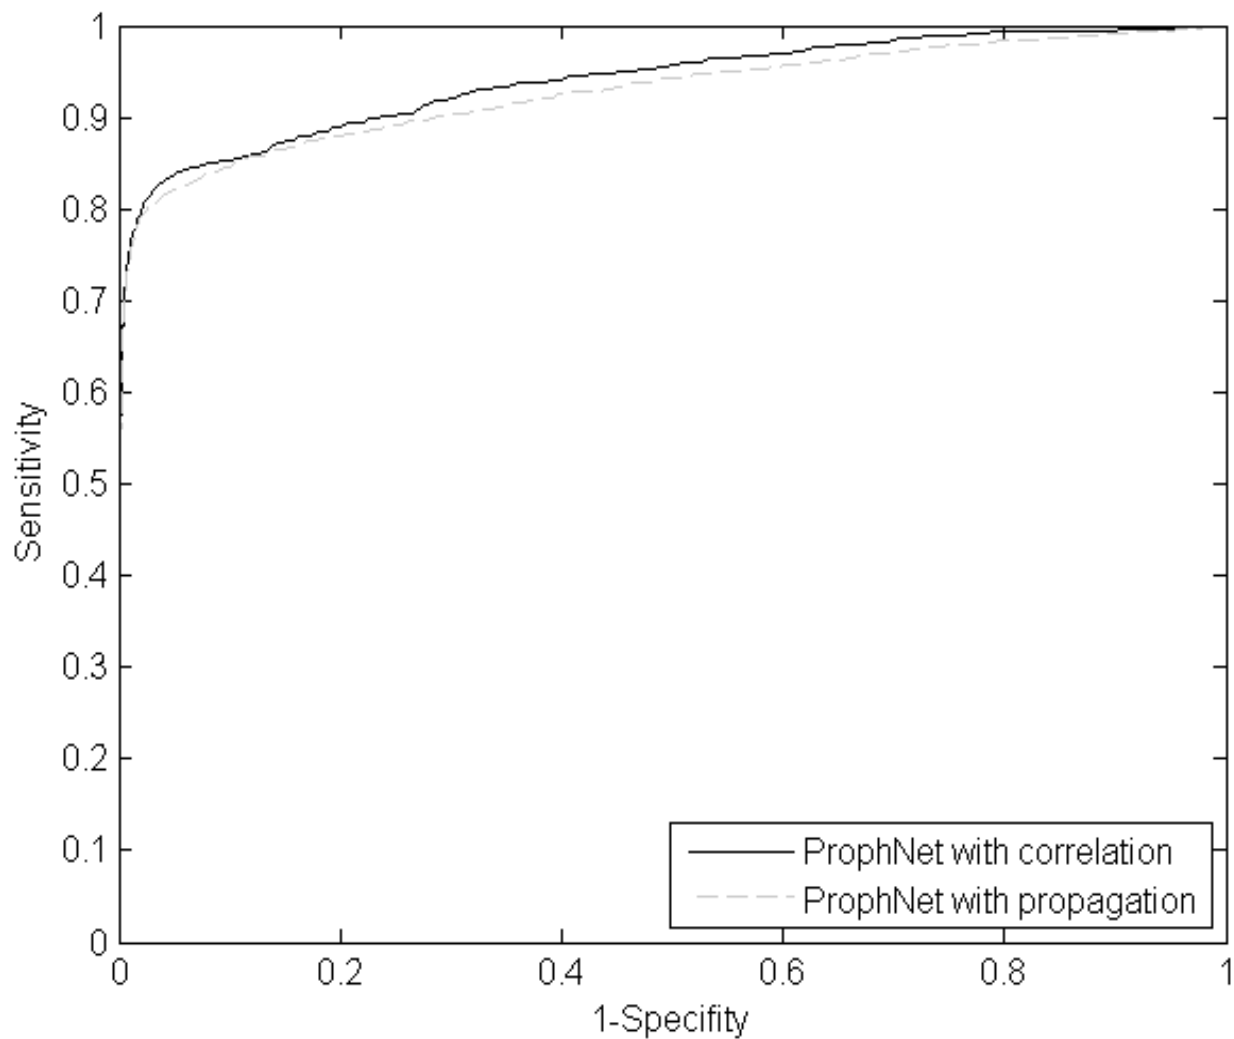

| <b>Method</b>             | <b>Correlation</b> | <b>Propagation</b> |
|---------------------------|--------------------|--------------------|
| <b>AUC</b>                | 0.9393             | 0.9277             |
| <b>Mean ranking</b>       | 309                | 368                |
| <b>Standard deviation</b> | 811                | 944                |
