# Supplementary material for: ProphNet: A generic prioritization method through propagation of information
Source: PubMed Central journal article supplement (PMC4015146; doi:10.1186/1471-2105-15-s1-s5), 2014-01-10
Supplement: 1471-2105-15-S1-S5-S2.pdf [file 1471-2105-15-S1-S5-S2.pdf]

**ROBUSTNESS ANALYSIS RESULTS**  
**(GENE-DISEASE VALIDATION WITH NEW OMIM ASSOCIATIONS)**

| <b>Gamma</b> | <b>AUC</b> | <b>Normalized mean ranking (Std. Dev)</b> |
|--------------|------------|-------------------------------------------|
| 0.0005       | 0.79834    | 0.2018 (0.2613)                           |
| 0.0010       | 0.80599    | 0.1942 (0.2604)                           |
| 0.0020       | 0.80792    | 0.1922 (0.2615)                           |
| 0.0030       | 0.80749    | 0.1927 (0.2621)                           |
| 0.0040       | 0.80685    | 0.1933 (0.2619)                           |
| 0.0050       | 0.80669    | 0.1935 (0.2617)                           |
| 0.0100       | 0.80526    | 0.1949 (0.2619)                           |
| 0.0300       | 0.79982    | 0.2003 (0.2644)                           |
| 0.0500       | 0.79684    | 0.2033 (0.2649)                           |
| 0.1000       | 0.7916     | 0.2086 (0.2666)                           |
| 0.5000       | 0.78169    | 0.2185 (0.2696)                           |
| 1.0000       | 0.78169    | 0.2185 (0.2696)                           |
