# Supplementary material for: ProphNet: A generic prioritization method through propagation of information
Source: PubMed Central journal article supplement (PMC4015146; doi:10.1186/1471-2105-15-s1-s5), 2014-01-10

# PROPHNET EXECUTION TIMES AND MEMORY USAGE

## Algorithm execution times

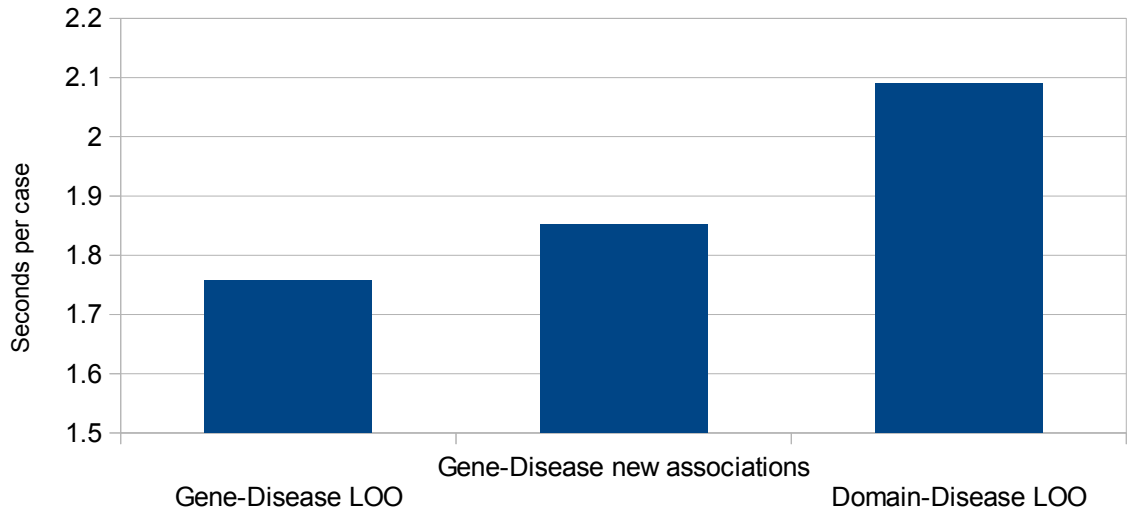

## Memory usage

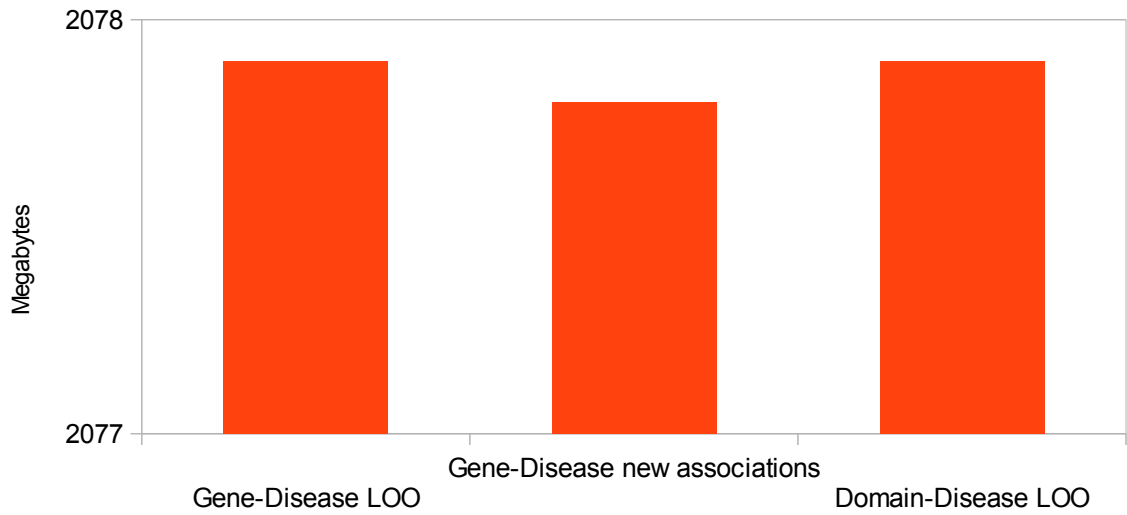

Supplement: 1471-2105-15-S1-S5-S3.pdf [file 1471-2105-15-S1-S5-S3.pdf]
