# Supplementary material for: ProphNet: A generic prioritization method through propagation of information
Source: PubMed Central journal article supplement (PMC4015146; doi:10.1186/1471-2105-15-s1-s5), 2014-01-10
Supplement: 1471-2105-15-S1-S5-S4.pdf [file 1471-2105-15-S1-S5-S4.pdf]

**TOP 50 ALZHEIMER (MIM:104300) GENES PRIORITIZED BY PROPHNET**

| <b>Rank</b> | <b>Gene</b> | <b>Score</b> | <b>Rank</b> | <b>Gene</b> | <b>Score</b> |
|-------------|-------------|--------------|-------------|-------------|--------------|
| 1           | APP         | 0.66395      | 26          | SIRPB1      | 0.069677     |
| 2           | PSEN2       | 0.54624      | 27          | KCNIP4      | 0.067622     |
| 3           | MAPT        | 0.25306      | 28          | CHMP2B      | 0.066392     |
| 4           | PSEN1       | 0.19459      | 29          | ICAM5       | 0.06531      |
| 5           | TREM2       | 0.17         | 30          | APBB3       | 0.063825     |
| 6           | HD          | 0.15854      | 31          | APBA3       | 0.061983     |
| 7           | CST3        | 0.15113      | 32          | PRNP        | 0.06149      |
| 8           | ITM2B       | 0.14676      | 33          | COL25A1     | 0.059462     |
| 9           | TYROBP      | 0.1296       | 34          | HADHB       | 0.05945      |
| 10          | SNCA        | 0.12759      | 35          | CASP6       | 0.056407     |
| 11          | APOE        | 0.11406      | 36          | KCNIP3      | 0.055112     |
| 12          | NCSTN       | 0.11144      | 37          | SNCB        | 0.054846     |
| 13          | PSENE1      | 0.09454      | 38          | KIR2DS2     | 0.054442     |
| 14          | APH1A       | 0.09454      | 39          | NOTCH3      | 0.052885     |
| 15          | APH1B       | 0.093457     | 40          | KLRC3       | 0.052401     |
| 16          | METTL2B     | 0.091739     | 41          | PRSS3       | 0.05117      |
| 17          | HADH2       | 0.088582     | 42          | CHRNA7      | 0.050067     |
| 18          | SPON1       | 0.086666     | 43          | APBB2       | 0.04729      |
| 19          | TM2D1       | 0.086666     | 44          | NOTCH4      | 0.046163     |
| 20          | BACE2       | 0.086666     | 45          | CTNND2      | 0.044223     |
| 21          | DOCK3       | 0.077497     | 46          | SERPINI1    | 0.043768     |
| 22          | CD300E      | 0.069677     | 47          | FLNB        | 0.043587     |
| 23          | CLEC5A      | 0.069677     | 48          | CASP8       | 0.043244     |
| 24          | NCR2        | 0.069677     | 49          | APPBP1      | 0.042937     |
| 25          | TREM1       | 0.069677     | 50          | CTSD        | 0.042268     |

**TOP 50 DIABETES MELLITUS TYPE II (MIM: 125853) GENES PRIORITIZED BY PROPHNET**

| <b>Rank</b> | <b>Gene</b> | <b>Score</b> | <b>Rank</b> | <b>Gene</b> | <b>Score</b> |
|-------------|-------------|--------------|-------------|-------------|--------------|
| 1           | IRS1        | 0.4744       | 26          | PHIP        | 0.062078     |
| 2           | PPP1R3A     | 0.46597      | 27          | ATP2A3      | 0.062078     |
| 3           | SLC2A4      | 0.41937      | 28          | ATP2A1      | 0.062029     |
| 4           | IPF1        | 0.33078      | 29          | ACOX1       | 0.060055     |
| 5           | INSR        | 0.29497      | 30          | KCNJ11      | 0.059551     |
| 6           | TCF1        | 0.21682      | 31          | C1QTNF5     | 0.059257     |
| 7           | PLN         | 0.11641      | 32          | -           | 0.050414     |
| 8           | HADHSC      | 0.097584     | 33          | ATP2A2      | 0.050161     |
| 9           | LEPRE1      | 0.097584     | 34          | STRN3       | 0.048852     |
| 10          | -           | 0.097584     | 35          | ARF3        | 0.048383     |
| 11          | MLSTD2      | 0.097584     | 36          | SLN         | 0.048282     |
| 12          | FAM62B      | 0.097584     | 37          | ABCC8       | 0.04558      |
| 13          | IDH2        | 0.097584     | 38          | PSMD7       | 0.044634     |
| 14          | NEUROD1     | 0.090461     | 39          | MVP         | 0.043341     |
| 15          | PCSK1       | 0.077833     | 40          | SNF1LK2     | 0.042414     |
| 16          | SLC2A2      | 0.075549     | 41          | EHD2        | 0.042374     |
| 17          | TCF2        | 0.074199     | 42          | PPARG       | 0.041591     |
| 18          | MAFA        | 0.070823     | 43          | PCSK1N      | 0.041119     |
| 19          | PDIA6       | 0.070718     | 44          | HK2         | 0.04051      |
| 20          | FKBP10      | 0.069568     | 45          | BPY2IP1     | 0.0403       |
| 21          | KBTBD10     | 0.067907     | 46          | SPOP        | 0.039407     |
| 22          | DLD         | 0.066068     | 47          | ENPP1       | 0.038238     |
| 23          | ARFIP1      | 0.064772     | 48          | MFRP        | 0.038163     |
| 24          | RPS6KA1     | 0.064346     | 49          | RAB7        | 0.037582     |
| 25          | IAPP        | 0.062876     | 50          | GATA5       | 0.036751     |

**TOP 50 BREAST CANCER (MIM:114480) GENES PRIORITIZED BY PROPHNET**

| <b>Rank</b> | <b>Gene</b> | <b>Score</b> | <b>Rank</b> | <b>Gene</b> | <b>Score</b> |
|-------------|-------------|--------------|-------------|-------------|--------------|
| 1           | BRCA1       | 0.50185      | 26          | TREX1       | 0.060285     |
| 2           | RAD51       | 0.49193      | 27          | HMG20B      | 0.058471     |
| 3           | BRCA2       | 0.4813       | 28          | MRE11A      | 0.057521     |
| 4           | NBN         | 0.3547       | 29          | CHEK2       | 0.055145     |
| 5           | PIK3CA      | 0.31986      | 30          | CDK4        | 0.054203     |
| 6           | MSH2        | 0.16361      | 31          | ERCC2       | 0.052391     |
| 7           | RB1         | 0.16072      | 32          | BAP1        | 0.051401     |
| 8           | TP53        | 0.13068      | 33          | MSH6        | 0.051175     |
| 9           | ELAC2       | 0.10385      | 34          | -           | 0.050248     |
| 10          | RAD51AP1    | 0.10305      | 35          | MLH1        | 0.049023     |
| 11          | RAD54L      | 0.10305      | 36          | MUTYH       | 0.048841     |
| 12          | FANCD2      | 0.10167      | 37          | RPA1        | 0.048761     |
| 13          | ATM         | 0.093381     | 38          | C17orf28    | 0.048712     |
| 14          | RNASEL      | 0.083185     | 39          | TP53BP1     | 0.048516     |
| 15          | BCCIP       | 0.0778       | 40          | AXIN2       | 0.048076     |
| 16          | SHFM1       | 0.077161     | 41          | SMC1L1      | 0.047339     |
| 17          | DCLRE1C     | 0.076188     | 42          | BUB1B       | 0.046962     |
| 18          | C11orf30    | 0.075987     | 43          | FANCG       | 0.04636      |
| 19          | BLM         | 0.074494     | 44          | RAD52       | 0.04634      |
| 20          | DMC1        | 0.070191     | 45          | ATRX        | 0.045625     |
| 21          | MDC1        | 0.069038     | 46          | STK11       | 0.044099     |
| 22          | RAD50       | 0.065818     | 47          | BCL2        | 0.042166     |
| 23          | H2AFX       | 0.06564      | 48          | EXO1        | 0.041624     |
| 24          | ATR         | 0.065553     | 49          | GABRB1      | 0.04145      |
| 25          | PTEN        | 0.060815     | 50          | RET         | 0.040784     |
