# Supplementary material for: ProphNet: A generic prioritization method through propagation of information
Source: PubMed Central journal article supplement (PMC4015146; doi:10.1186/1471-2105-15-s1-s5), 2014-01-10
Supplement: 1471-2105-15-S1-S5-S5.pdf [file 1471-2105-15-S1-S5-S5.pdf]

# PROPHNET WEB TOOL USER GUIDE

ProphNet web tool allows users to perform prioritizations of genes-diseases-proteins domains. The tool has been designed to be easy to use. ProphNet does not require any registration or identification for use. When we enter prophnet we see the following screen.

**1** ProphNet About Download Contact

### Prioritization settings

Configure your query parameters. Genes, domains or phenotypes names must be separated by a new line. You can load one of the following examples: [Example 1](#), [Example 2](#) or [Example 3](#).

Query or input type:  
Genes Domains Diseases

Target or output type:  
Genes Domains Diseases

Query entities:

Enter gene symbol Add

Undo Clear Prioritize

## ProphNet

A major goal of biologists is to determine the underlying genetic causes of human diseases in order to better understand them and support their prevention and treatment. High-throughput technologies such as linkage analysis, association studies and expression array experiments allow to obtain chromosomal regions associated with genetic conditions but they are costly and time expensive. The ProphNet prioritization system can help in this work by obtaining new relationships or interactions between different biological entities quickly and without costs.

Learn more »

- High performance**  
ProphNet has been validated through a variety of test featuring better performance than other state of the art methods.
- Heterogeneous datasets**  
ProphNet can work with different types of biological entities and relations with different meanings at the same time.
- Easily extendable**  
ProphNet allows new data sources to be easily added and combined without modifying underlying algorithms.

We can see three different parts in the interface. The action bar **[1]** allows direct access to a number of interesting additional information about ProphNet and Matlab source code. The prioritization settings **[2]** area is the space where the user sets the parameters of prioritization to be performed. Finally, the work space **[3]**, which initially only contains information about ProphNet, is the area where the user will see the results of the prioritization.

Users interact with the tool using prioritization settings area. This area can be seen in more detail in the following figure.

## Prioritization settings

Configure your query parameters. Genes, domains or phenotypes names must be separated by a new line. You can load one of the following examples: [Example 1](#), [Example 2](#) or [Example 3](#).

Query or input type:  
Genes Domains Diseases

Target or output type:  
Genes Domains Diseases

Query entities:

BRCA1  
BRCA2

TP53 Add

Undo Clear Prioritize

This area contains multiple elements. The first one, is a help text **[1]**. This text explains what type of input is expected. The user can also load some examples clicking on the links. To configure a prioritization the user first have to specify a query or input type **[2]** and a target or output type **[3]**. With the configuration of the figure, the user would introduce genes identifiers and would obtain a list of ranked diseases. The input list **[4]** is the component where the user introduces the list of identifiers of the elements for the query. Each element must be introduced in a new line. To help users to input correct names, an auto-complete component is available **[5]**. Based on user input, this component will suggest matching names. For details on what types of identifiers are supported, the user can press the button with the exclamation mark. Finally, some action buttons **[6]** are provided. After entering prioritization settings the user must press the *Prioritize* button. While performing prioritization the following dialog will be displayed.

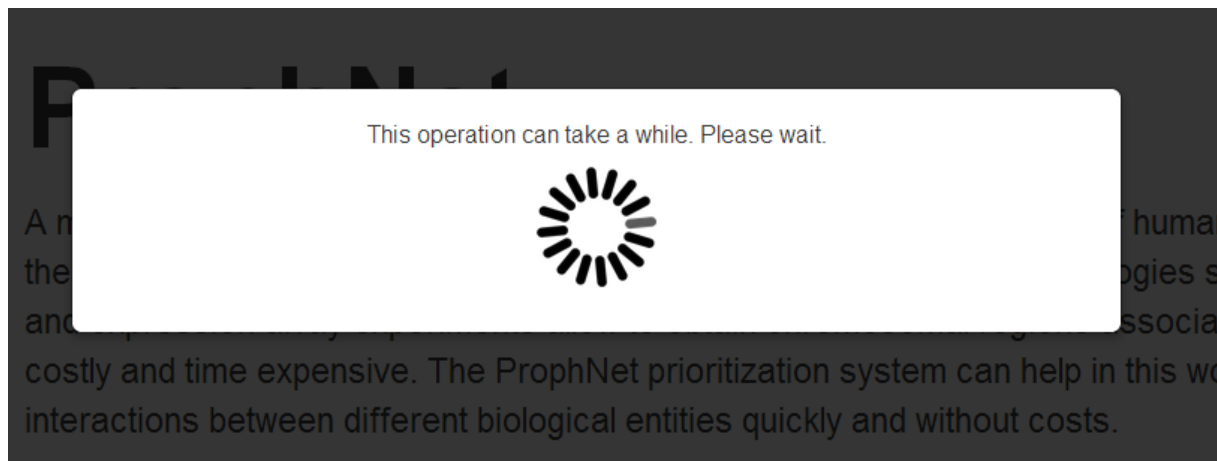

Prioritization can take several minutes depending on the server load. After this wait, results are shown as the following figure.

Download prioritization as Excel file **3**

The following elements were not used: BRCA50 **2**

| Rank | Name                                                                                           | Score          |
|------|------------------------------------------------------------------------------------------------|----------------|
| 1    | <a href="#">BREAST CANCER</a>                                                                  | 0.625768955069 |
| 2    | <a href="#">BREAST CANCER 1 GENE; BRCA1</a>                                                    | 0.613271982946 |
| 3    | <a href="#">LI-FRAUMENI SYNDROME 1; LFS1</a>                                                   | 0.460013786603 |
| 4    | <a href="#">PAPILLOMA OF CHOROID PLEXUS</a>                                                    | 0.343125717153 |
| 5    | <a href="#">ESOPHAGEAL CANCER ESOPHAGEAL SQUAMOUS CELL CARCINOMA, INCLUDED; ESCC, INCLUDED</a> | 0.321175565746 |
| 6    | <a href="#">LUNG CANCER</a>                                                                    | 0.209223754869 |
| 7    | <a href="#">LYNCH SYNDROME I</a>                                                               | 0.202821004787 |
| 8    | <a href="#">RETINOBLASTOMA; RB1</a>                                                            | 0.168166254066 |
| 9    | <a href="#">COLORECTAL CANCER; CRC</a>                                                         | 0.155062936033 |
| 10   | <a href="#">MELANOMA, UVEAL</a>                                                                | 0.141764548269 |
| 11   | <a href="#">ADAMANTINOMA OF LONG BONES</a>                                                     | 0.140360981553 |
| 12   | <a href="#">OSTEOGENIC SARCOMA</a>                                                             | 0.134475867062 |
| 13   | <a href="#">MUIR-TORRE SYNDROME; MTS</a>                                                       | 0.129579568133 |
| 14   | <a href="#">PROSTATE CANCER</a>                                                                | 0.127464796985 |
| 15   | <a href="#">PLEUROPULMONARY BLASTOMA</a>                                                       | 0.126572243258 |
| 16   | <a href="#">TESTICULAR TUMORS</a>                                                              | 0.118364908022 |
| 17   | <a href="#">LUNG CANCER 1</a>                                                                  | 0.111528778754 |
| 18   | <a href="#">B-CELL CLL/LYMPHOMA 2; BCL2</a>                                                    | 0.110902943755 |
| 19   | <a href="#">RENAL CELL CARCINOMA 1; RCC1</a>                                                   | 0.106310734088 |
| 20   | <a href="#">BLOOM SYNDROME; BLM</a>                                                            | 0.106197735948 |
| 21   | <a href="#">MOVED TO 120435</a>                                                                | 0.106036129718 |
| 22   | <a href="#">PANCREATIC CARCINOMA</a>                                                           | 0.102643724513 |

**1**

We can see different parts in the results area. The ranked table **[1]** is the essential part. This table shows the rank, the name or identifier and the assigned score to each element. Names can be clicked for more details about each entry. The elements in the red bar **[2]** are those that have been excluded from the query due to not being in ProphNet database. Finally, blue bar **[3]** lets users download results as Excel files.
